# Supplementary material for: Highly diverse emission of volatile organic compounds by Sitka spruce and determination of their emission pathways
Source: Royal Society of Chemistry journal article supplement (doi:10.1039/d4ea00138a), 2025-01-01
Supplement: d4ea00138a1.pdf [file d4ea00138a1.pdf]

## Highly diverse emission of volatile organic compounds by Sitka spruce and determination of their emission pathways

Hayley Furnell<sup>1, 2</sup>, John Wenger<sup>1, 2</sup>, Astrid Wingler<sup>2, 3</sup>, Kieran N. Kilcawley<sup>4, 5</sup>, David T. Mannion<sup>4, 5</sup>, Iwona Skibinska<sup>4, 5</sup>, Julien Kammer<sup>1, 2, 6</sup>

<sup>1</sup>School of Chemistry, University College Cork, Cork, T12 YN60, Ireland

<sup>2</sup>Environmental Research Institute, University College Cork, Cork, T23 XE10, Ireland

<sup>3</sup>School of Biological, Earth and Environmental Sciences, University College Cork, Cork, T23 TK30, Ireland

<sup>4</sup>Department of Food Quality and Sensory Science, Teagasc Food Research Centre, Moorepark, Fermoy, Cork, P61 C996, Ireland

<sup>5</sup>School of Food and Nutritional Science, University College Cork, T12 R220, Ireland

<sup>6</sup>Aix Marseille Université, CRNS, LCE, Marseille, 13331, France

*Correspondence to:* Julien Kammer ([julien.Kammer@univ-amu.fr](mailto:julien.Kammer@univ-amu.fr))

**Supplementary Information**

### ***Set-up***

Individual cylindrical Teflon enclosures were made for each spruce tree, using clear 0.1 mm thick Teflon FEP foil (Ortega and Helmig, 2008). The enclosures were designed to encompass all except the bottom few branches of the trees, and to minimise contact between the contained branches and the interior wall of the enclosure (Ortega and Helmig, 2008; Janson et al., 1999). The tops of the enclosures were fitted with a ¼" inlet port and a ½" outlet port. A length of ¼" Teflon tubing extended 20 cm from the inlet port into the enclosure to ensure homogenisation (Niinemets et al., 2011). The enclosures were sealed around the trees a week before emissions sampling was commenced. A separate, Empty enclosure, was made for background measurements (Hayward et al., 2004) (Fig. S3). ¼

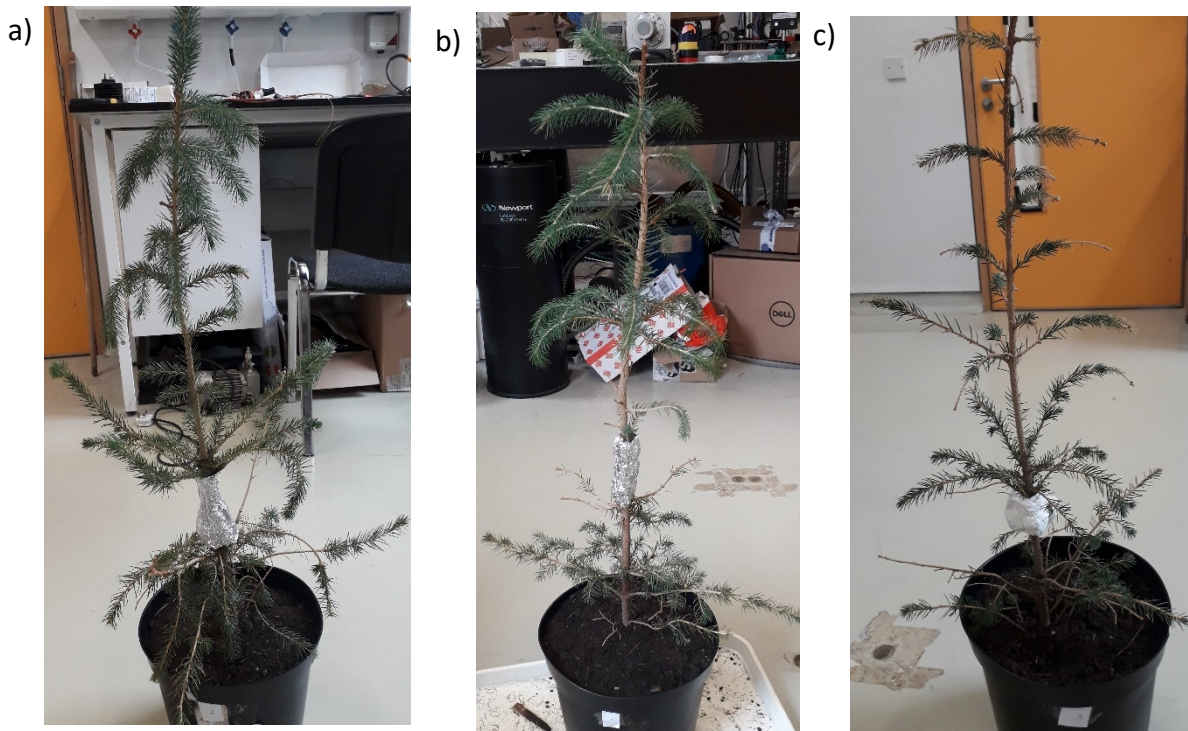

**Figure S1** Three Sitka spruce saplings used in this work: a) Spruce 1, b) Spruce 2 and c) Spruce 3.

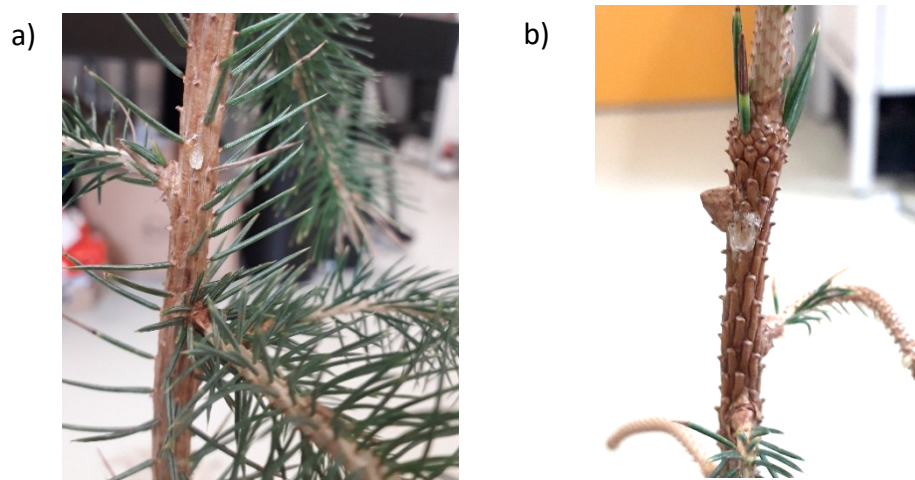

**Figure S2** Resin deposits on a) Spruce 1 and b) Spruce 3.

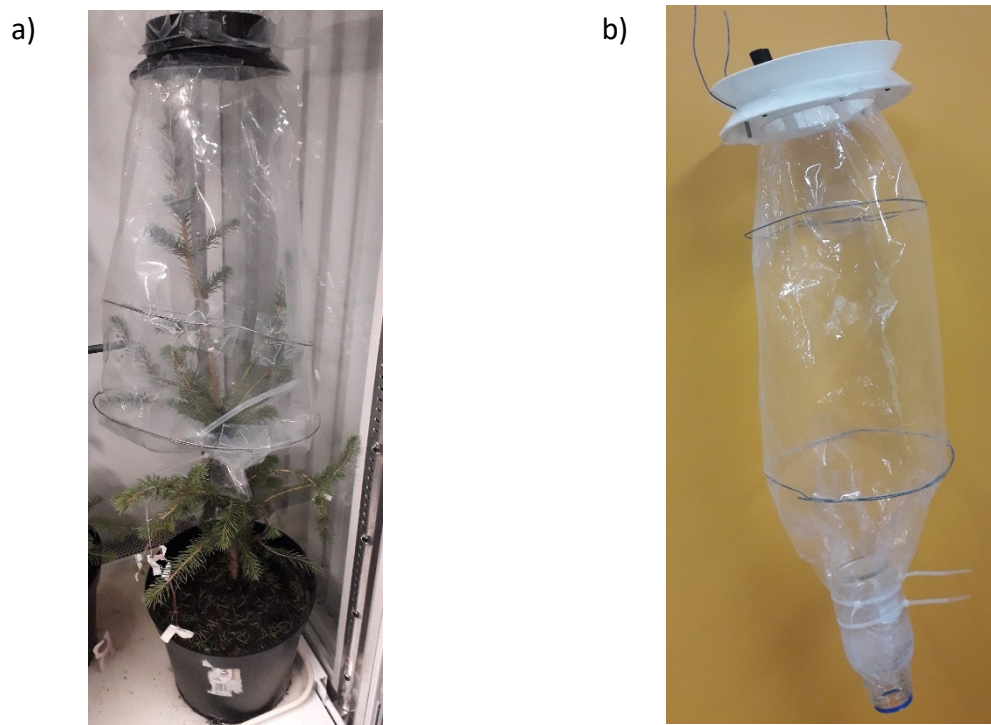

**Figure S3** Enclosure around a) Spruce sapling and b) empty enclosure.

#### Plant growth cycles

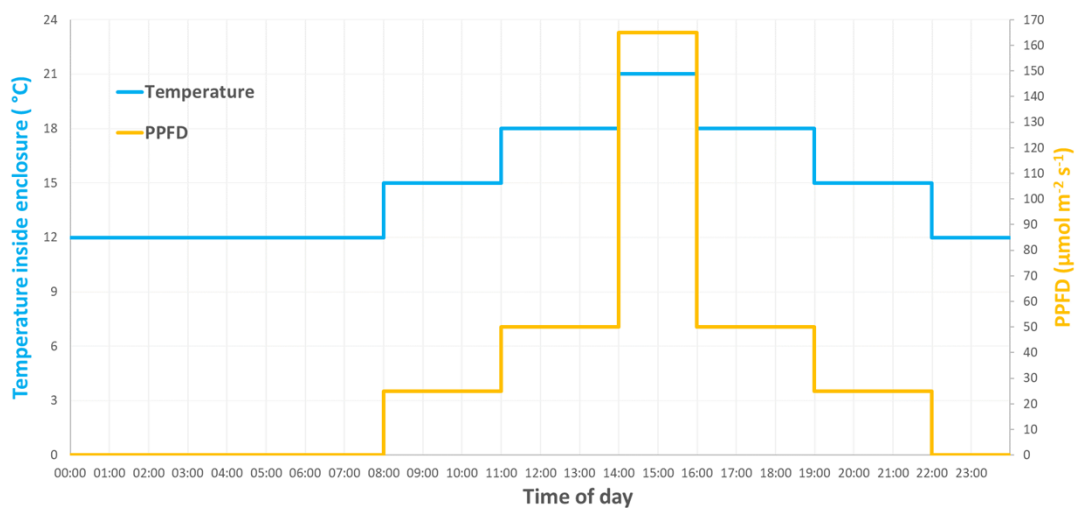

**Figure S4** Temperature and PPFD variation during the Daily Cycle.

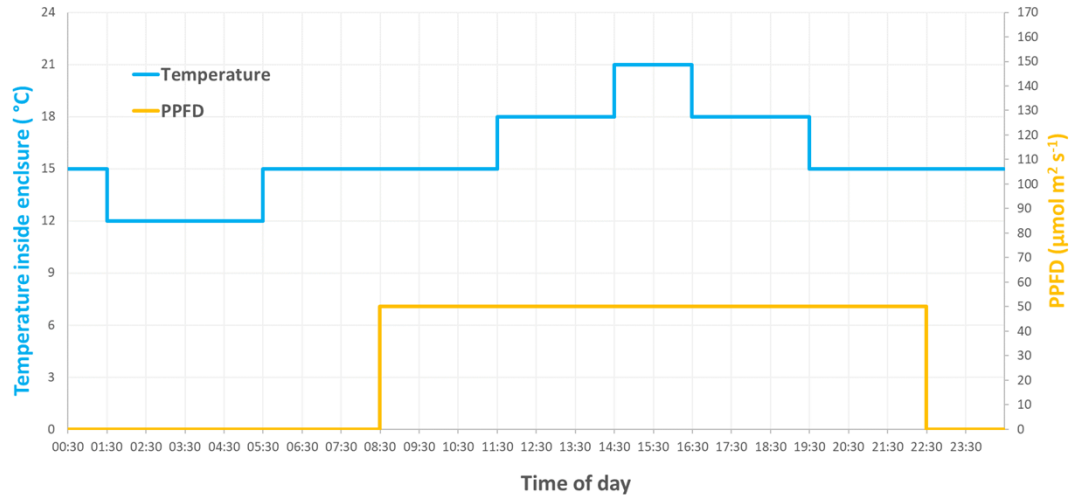

**Figure S5** Temperature and PPFD variation during the Temperature Cycle.

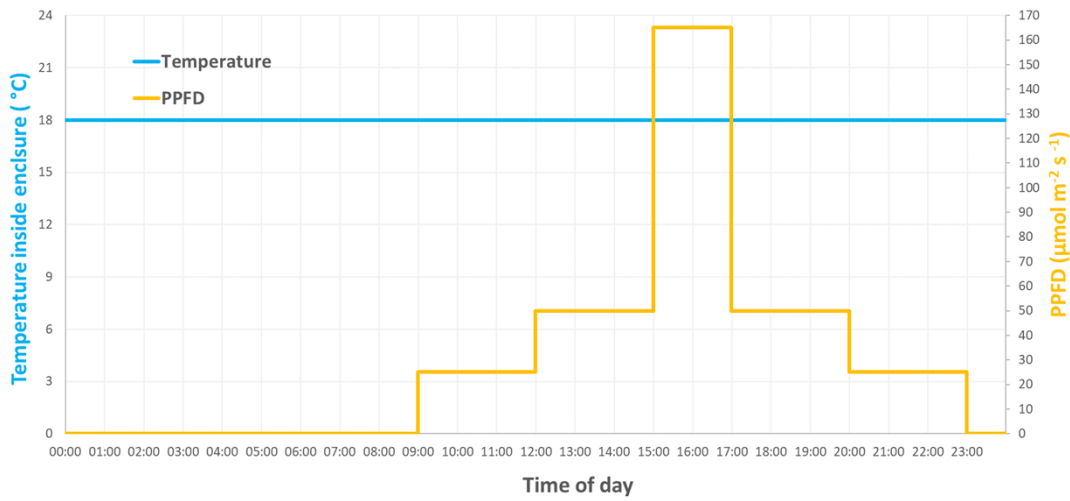

**Figure S6** Temperature and PPFD variation during the Light Cycle.

### Biomass measurements

**Table S1** Dried biomass measurements for each spruce tree.

|          | Dried Needle Mass | Dried Needle and Branch Mass |
|----------|-------------------|------------------------------|
|          | g                 | g                            |
| Spruce 1 | 8.03              | 18.50                        |
| Spruce 2 | 9.80              | 19.56                        |
| Spruce 3 | 3.77              | 11.33                        |

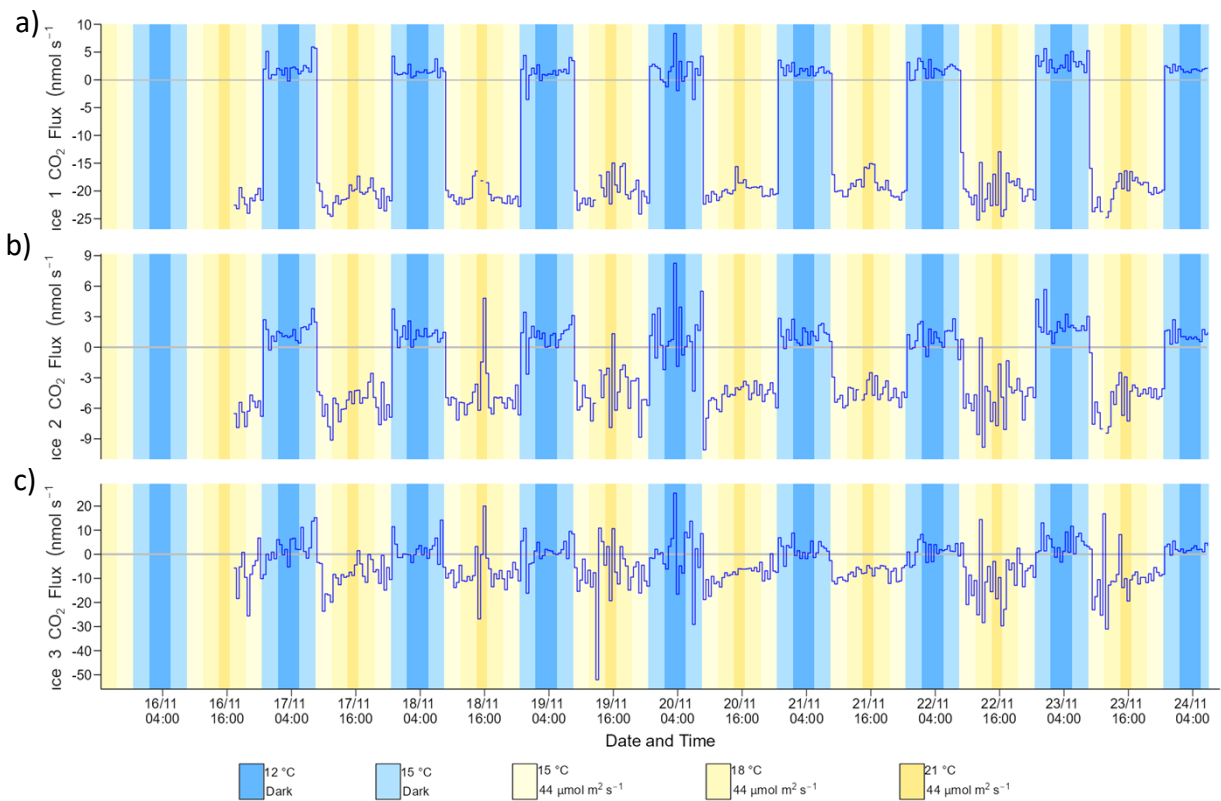

### Temperature Cycle

**Figure S7** Time series of the CO<sub>2</sub> flux for a) Spruce 1, b) Spruce 2 and c) Spruce 3 during the Temperature Cycle.

### Light Cycle

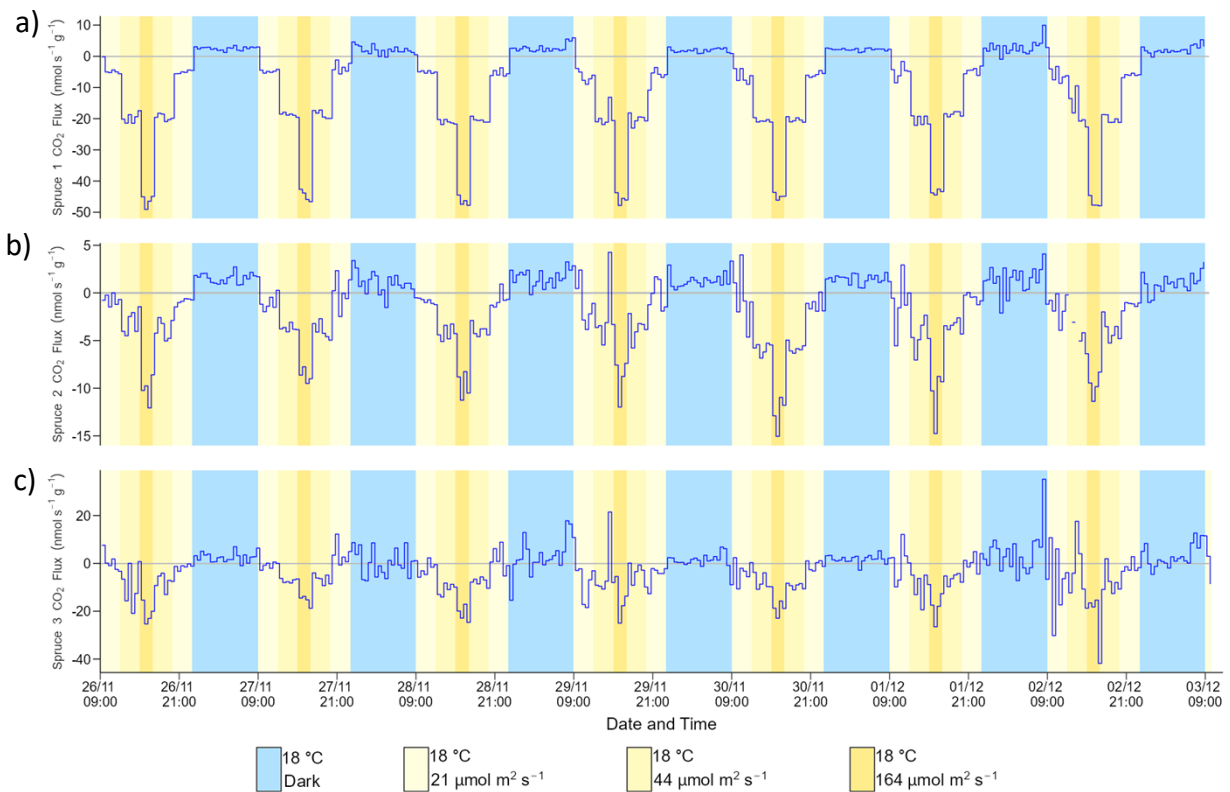

**Figure S8** Time series of CO<sub>2</sub> flux for a) Spruce 1 b) Spruce2, and c) Spruce 3 during the Light Cycle.

**BVOC emissions**

**Table S2** BVOC emissions from Spruce 1 and Spruce 2 detected with ToF-CIMS and TD-GC/MS.

| Formula                                        | MW<br>g mol <sup>-1</sup> | Name                     | Spruce 1 |          | Spruce 2 |          |
|------------------------------------------------|---------------------------|--------------------------|----------|----------|----------|----------|
|                                                |                           |                          | ToF-CIMS | TD-GC/MS | ToF-CIMS | TD-GC/MS |
| C <sub>3</sub> H <sub>9</sub> N                | 59.11                     |                          | ✓        |          |          |          |
| C <sub>2</sub> H <sub>4</sub> O <sub>2</sub>   | 60.05                     | Acetic acid              |          |          |          | ✓        |
| C <sub>5</sub> H <sub>8</sub>                  | 68.12                     | Isoprene                 | ✓        | ✓        |          | ✓        |
| C <sub>4</sub> H <sub>6</sub> O                | 70.09                     | Methacrolein             |          |          |          | ✓        |
| C <sub>3</sub> H <sub>6</sub> O <sub>2</sub>   | 74.08                     | Propanoic acid           |          | ✓        |          | ✓        |
| C <sub>4</sub> H <sub>10</sub> O               | 74.12                     | 1-Butanol                |          |          |          | ✓        |
| C <sub>6</sub> H <sub>8</sub>                  | 80.13                     |                          |          |          | ✓        |          |
| C <sub>5</sub> H <sub>6</sub> O                | 82.10                     | 2-Methyl-furan           |          | ✓        |          | ✓        |
| C <sub>5</sub> H <sub>8</sub> O                | 84.12                     | <i>E</i> -3-Penten-2-one |          |          |          | ✓        |
| C <sub>5</sub> H <sub>10</sub> O               | 86.13                     | 2-Methyl-3-buten-2-ol    |          | ✓        |          |          |
|                                                |                           | 2-Pentanone              |          | ✓        |          | ✓        |
|                                                |                           | Pentanal                 |          |          |          | ✓        |
| C <sub>4</sub> H <sub>8</sub> O <sub>2</sub>   | 88.11                     | Butanoic acid            |          |          |          | ✓        |
| C <sub>3</sub> H <sub>8</sub> N <sub>2</sub> O | 88.11                     |                          | ✓        |          |          |          |
| C <sub>5</sub> H <sub>12</sub> O               | 88.15                     | 3-Methyl-1-butanol       |          | ✓        |          | ✓        |
| C <sub>7</sub> H <sub>8</sub>                  | 92.14                     |                          | ✓        |          | ✓        |          |
| C <sub>6</sub> H <sub>6</sub> O                | 94.11                     | Phenol                   |          |          |          | ✓        |
| C <sub>6</sub> H <sub>8</sub> O                | 96.13                     |                          |          |          | ✓*       |          |
| C <sub>6</sub> H <sub>10</sub> O               | 98.15                     | <i>E</i> -2-Hexenal      |          |          | ✓        | ✓        |
| C <sub>5</sub> H <sub>8</sub> O <sub>2</sub>   | 100.13                    |                          | ✓        |          |          |          |
| C <sub>6</sub> H <sub>12</sub> O               | 100.16                    | Hexanal                  |          |          |          | ✓        |
|                                                |                           | 2-Hexanone               |          |          |          | ✓        |
| C <sub>7</sub> H <sub>16</sub>                 | 100.20                    | Heptane                  |          | ✓        |          | ✓        |
| C <sub>6</sub> H <sub>14</sub> O               | 102.18                    | 1-Hexanol                |          | ✓        |          | ✓        |
| C <sub>7</sub> H <sub>8</sub> O                | 108.14                    |                          | ✓        |          | ✓        |          |
| C <sub>8</sub> H <sub>12</sub>                 | 108.18                    |                          | ✓        |          | ✓        |          |
| C <sub>7</sub> H <sub>10</sub> O               | 110.15                    |                          |          |          | ✓        |          |
| C <sub>5</sub> H <sub>10</sub> NO <sub>2</sub> | 117.15                    |                          | ✓        |          |          |          |
| C <sub>8</sub> H <sub>8</sub> O                | 120.15                    | Acetophenone             |          |          |          | ✓        |
| C <sub>9</sub> H <sub>12</sub>                 | 120.19                    |                          | ✓        |          | ✓        |          |
| C <sub>7</sub> H <sub>12</sub> N <sub>2</sub>  | 124.18                    |                          | ✓        |          |          |          |
| C <sub>8</sub> H <sub>12</sub> O               | 124.18                    |                          |          |          | ✓        |          |
| C <sub>8</sub> H <sub>16</sub> O               | 128.21                    | 1-Octen-3-ol             |          |          |          | ✓        |
| C <sub>10</sub> H <sub>10</sub>                | 130.19                    |                          | ✓        |          |          |          |
| C <sub>8</sub> H <sub>18</sub> O               | 130.23                    | 2-ethyl-1-hexanol        |          |          |          | ✓        |
| C <sub>10</sub> H <sub>14</sub>                | 134.22                    | o-Cymene                 |          | ✓        |          | ✓        |

|                                                |        |                       |   |   |    |   |
|------------------------------------------------|--------|-----------------------|---|---|----|---|
| C <sub>9</sub> H <sub>8</sub> O                | 132.16 | (E)-Cinnamaldehyde    | ✓ | ✓ | ✓  | ✓ |
| C <sub>6</sub> H <sub>14</sub> O <sub>3</sub>  | 134.18 |                       | ✓ |   |    |   |
| C <sub>8</sub> H <sub>8</sub> O <sub>2</sub>   | 136.15 | Methyl benzoate       |   | ✓ |    | ✓ |
| C <sub>9</sub> H <sub>12</sub> O               | 136.19 |                       |   |   | ✓  |   |
| C <sub>10</sub> H <sub>16</sub>                | 136.24 | Monoterpene           | ✓ |   | ✓* |   |
|                                                |        | Myrcene               |   | ✓ |    | ✓ |
|                                                |        | β-Phellandrene        |   | ✓ |    | ✓ |
|                                                |        | δ-Limonene            |   | ✓ |    | ✓ |
|                                                |        | α-Pinene              |   | ✓ |    | ✓ |
|                                                |        | Camphene              |   | ✓ |    | ✓ |
| C <sub>8</sub> H <sub>12</sub> O <sub>2</sub>  | 140.18 |                       |   |   | ✓  |   |
| C <sub>9</sub> H <sub>10</sub> O <sub>2</sub>  | 150.17 |                       |   |   | ✓  |   |
| C <sub>3</sub> H <sub>9</sub> N                | 150.22 |                       | ✓ |   |    |   |
| C <sub>7</sub> H <sub>4</sub> O <sub>4</sub>   | 152.10 |                       | ✓ |   |    |   |
| C <sub>8</sub> H <sub>8</sub> O <sub>3</sub>   | 152.14 | Methyl salicylate     |   | ✓ | ✓  | ✓ |
| C <sub>10</sub> H <sub>16</sub> O              | 152.23 | Piperitone            | ✓ | ✓ | ✓  | ✓ |
|                                                |        | Camphor               | ✓ | ✓ | ✓  | ✓ |
| C <sub>10</sub> H <sub>18</sub> O              | 154.25 | Eucalyptol            |   | ✓ | ✓  | ✓ |
| C <sub>12</sub> H <sub>16</sub>                | 160.25 |                       | ✓ |   |    |   |
| C <sub>11</sub> H <sub>14</sub> O              | 162.23 |                       | ✓ |   |    |   |
| C <sub>5</sub> H <sub>10</sub> O <sub>6</sub>  | 166.13 |                       | ✓ |   |    |   |
| C <sub>10</sub> H <sub>14</sub> O <sub>2</sub> | 166.22 |                       | ✓ |   | ✓* |   |
| C <sub>10</sub> H <sub>16</sub> O <sub>2</sub> | 168.24 |                       | ✓ |   |    |   |
| C <sub>10</sub> H <sub>20</sub> O <sub>2</sub> | 172.26 | Isopentyl isovalerate | ✓ | ✓ |    | ✓ |
| C <sub>12</sub> H <sub>16</sub> O              | 176.26 |                       |   |   | ✓  |   |
| C <sub>12</sub> H <sub>20</sub> O              | 180.29 |                       | ✓ |   |    |   |
| C <sub>10</sub> H <sub>16</sub> O <sub>3</sub> | 184.23 |                       |   |   | ✓  |   |
| C <sub>13</sub> H <sub>12</sub> O              | 184.24 |                       | ✓ |   |    |   |
| C <sub>14</sub> H <sub>16</sub> O              | 200.28 |                       | ✓ |   | ✓  |   |
| C <sub>10</sub> H <sub>18</sub> O <sub>4</sub> | 202.25 |                       | ✓ |   | ✓  |   |
| C <sub>15</sub> H <sub>24</sub>                | 204.36 | E-β-Farnesene         |   |   | ✓  | ✓ |
| C <sub>10</sub> H <sub>14</sub> O <sub>5</sub> | 214.22 |                       | ✓ |   |    |   |
| C <sub>17</sub> H <sub>26</sub> O              | 246.39 |                       | ✓ |   | ✓  |   |
| C <sub>20</sub> H <sub>24</sub>                | 264.40 |                       | ✓ |   | ✓  |   |
| C <sub>13</sub> H <sub>30</sub> O <sub>5</sub> | 266.37 |                       | ✓ |   | ✓  |   |
| C <sub>18</sub> H <sub>34</sub> O              | 266.46 |                       | ✓ |   | ✓  |   |
| C <sub>20</sub> H <sub>24</sub> O <sub>2</sub> | 296.40 |                       | ✓ |   | ✓  |   |

\* Isomers with different temporal trends detected by ToF-CIMS as different ions. Counted as two distinct BVOCs. Monoterpenes are ordered according to decreasing concentration, which were inferred from TD-GC/MS chromatogram peak areas. Yellow and red colours helped to visually identify compounds emitted by Spruce 1 and 2 respectively

### Chlorophyll fluorescence

Maximum photosystem II efficiency ( $F_v/F_m$ ) was determined by measuring chlorophyll fluorescence.  $F_v/F_m$  reflects the ability of photosystem II to reduce its electron acceptors in the photosynthetic electron transport chain and it is used to infer plant health (Henriques, 2009). The chlorophyll fluorescence was measured on three days during the *Daily Cycle* (Table 2).

**Table S3** Chlorophyll fluorescence measurements for Spruce 1 and Spruce 2 during the Daily Cycle. Each value is the average of three measurements taken from three branches on the same tree.

| Date       | PPFD<br>$\mu\text{mol m}^{-2} \text{s}^{-1}$ | Temperature<br>$^{\circ}\text{C}$ | Spruce 1  |      | Spruce 2  |      |
|------------|----------------------------------------------|-----------------------------------|-----------|------|-----------|------|
|            |                                              |                                   | $F_v/F_m$ | STD  | $F_v/F_m$ | STD  |
| 04/11/2021 | 0                                            | 12                                | 0.85      | 0.02 | 0.75      | 0.01 |
| 08/11/2021 | 0                                            | 12                                | 0.79      | 0.02 | 0.83      | 0.03 |
| 11/11/2021 | 0                                            | 12                                | 0.81      | 0.02 | 0.82      | 0.08 |

Chlorophyll fluorescence was measured in the dark period. The  $F_v/F_m$  values were similar for both Spruce 1 and Spruce 2 and was centred around 0.81 (unitless). However, for both trees values below 0.8 were recorded on one of the days, suggesting that there was some extent of photoinhibition due to stress. Lower  $F_v/F_m$  ratios indicate that all chlorophyll is not taking part in photosynthesis, which could be due to damage, and implies the plant is stressed (Maxwell and Johnson, 2000). It is unlikely the trees were suffering from stress, as the temperatures used in this study are representative of the natural environment, and the PPFD was an order of magnitude lower than that measured for the ambient atmosphere.



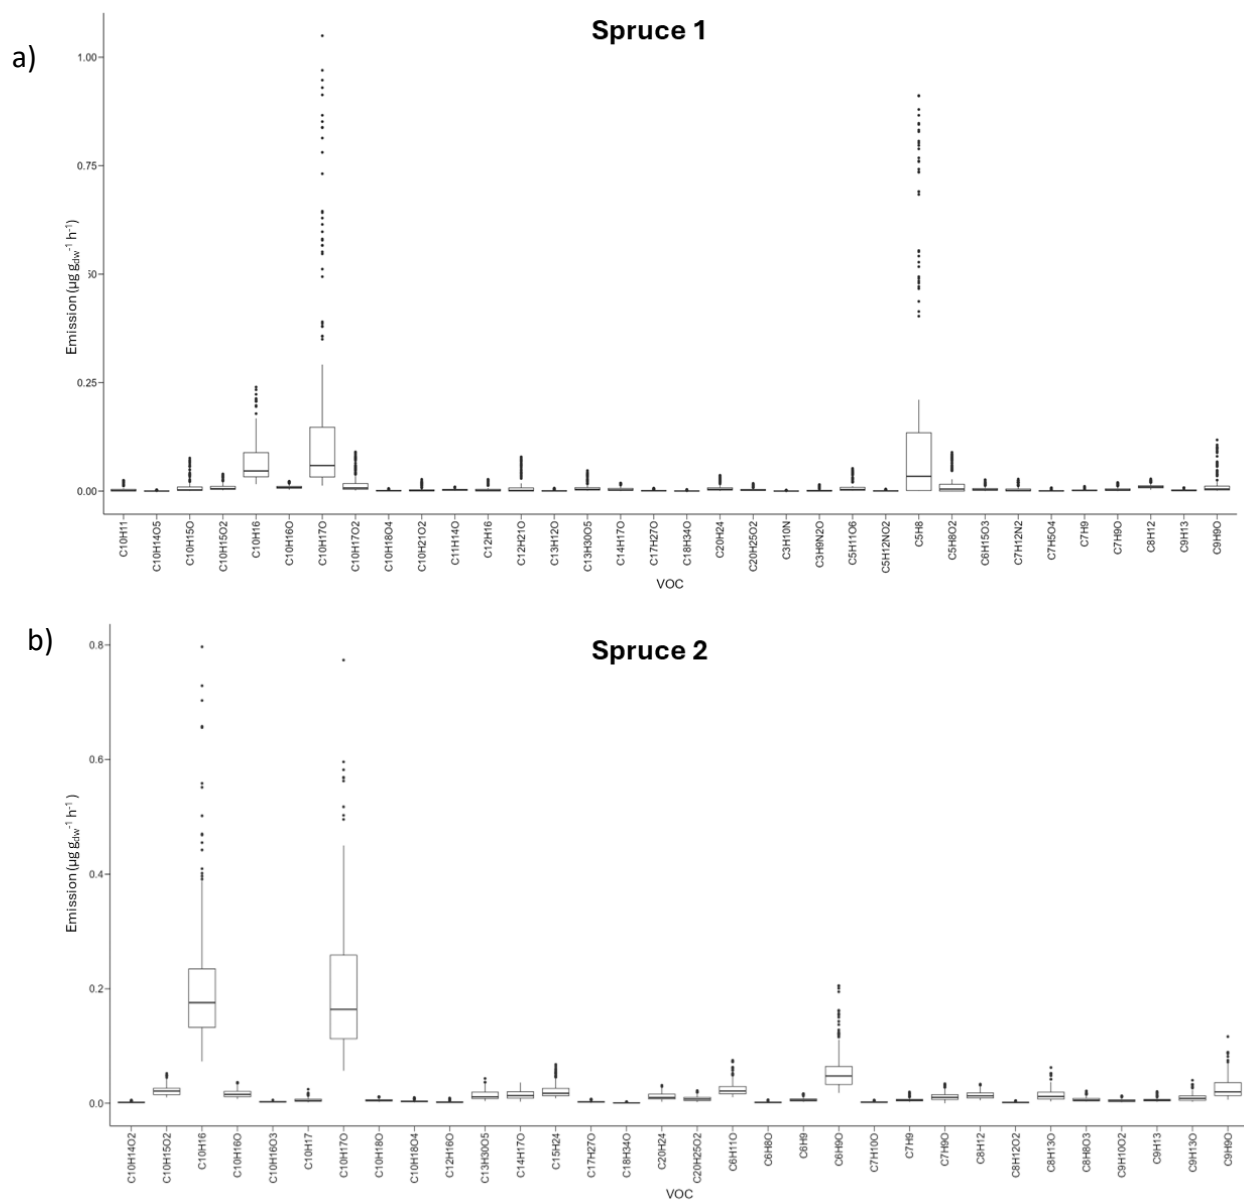

**Figure S9** Box plot for a) *Spruce 1* and b) *Spruce 2* (bottom) VOC emissions (in  $\mu\text{g g}_{\text{dw}}^{-1} \text{h}^{-1}$ ). The bar represents the median, the bottom and top limit of the box the 25<sup>th</sup> and 75<sup>th</sup> quantiles, and the end of bottom and top bars the 5<sup>th</sup> and 95<sup>th</sup> quantiles.

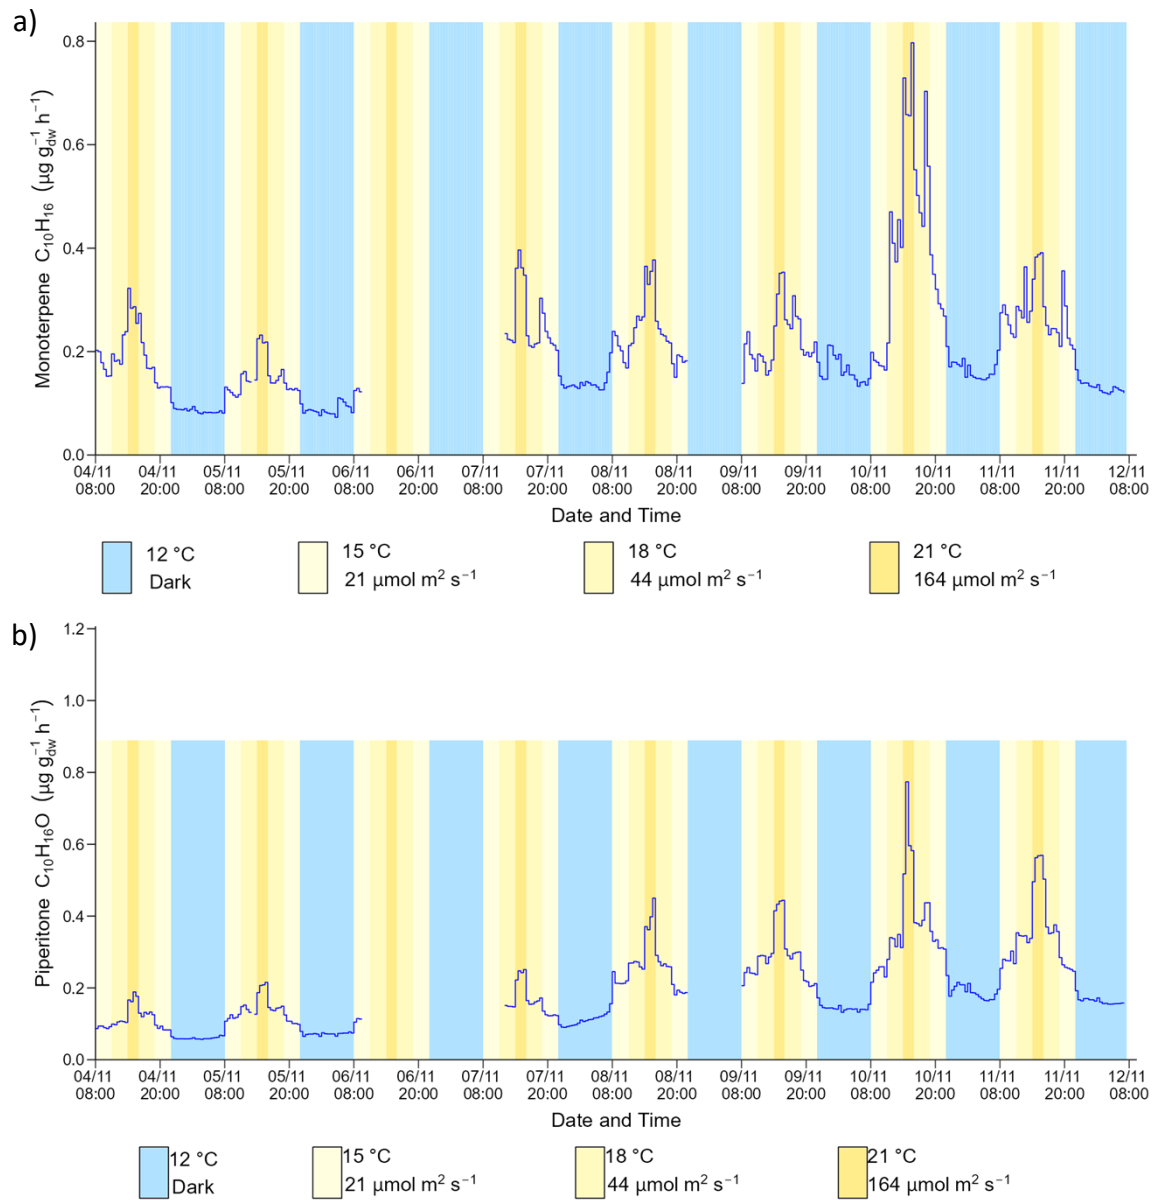

**Figure S10** Time series of a) piperitone ( $C_{10}H_{16}O$ ) and b) monoterpenes ( $C_{10}H_{16}$ ) emission fluxes from Spruce 2 during the Daily Cycle.

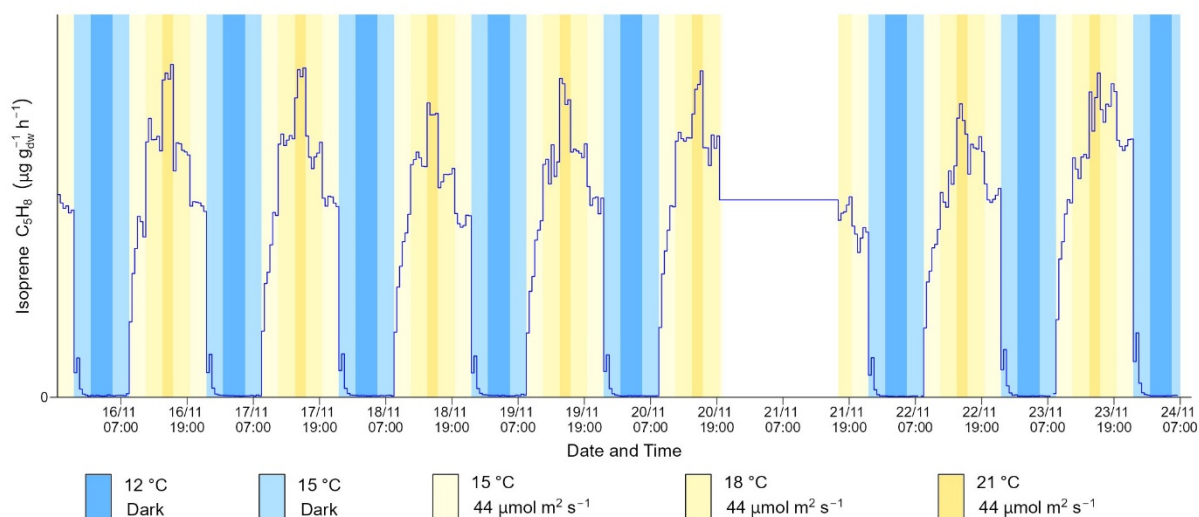

**Figure S11** Time series of the isoprene ( $C_5H_8$ ) emission flux from Spruce 2 during the Temperature Cycle.

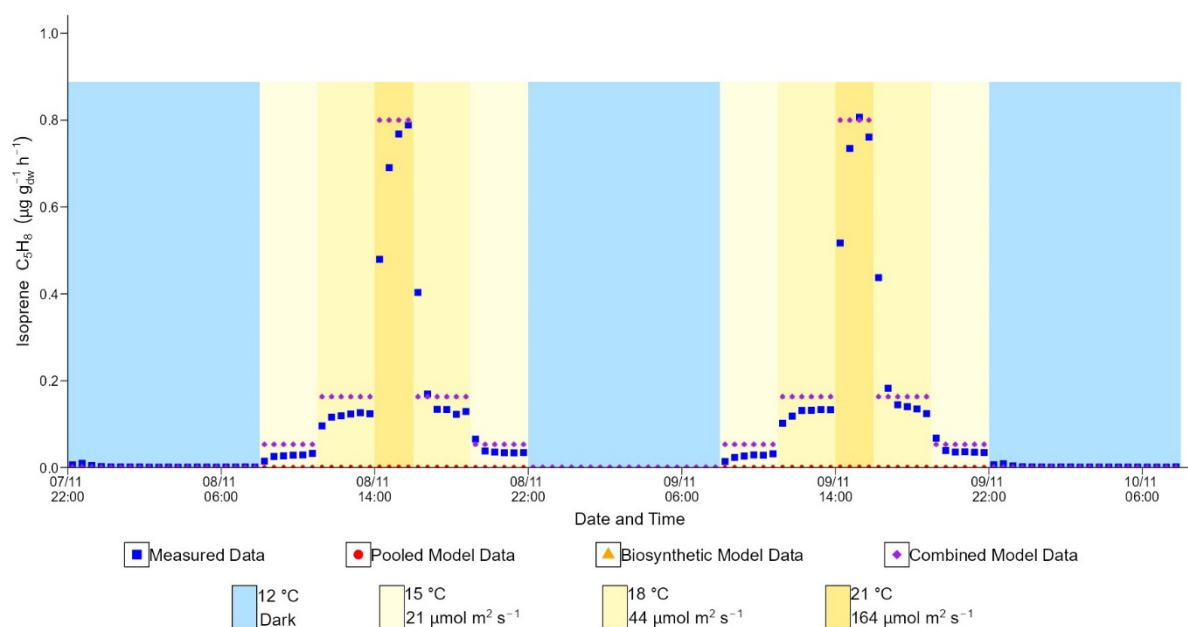

**Figure S12** Measured and all modelled data for the emission of isoprene from Spruce 1. As pooled emission was negligible, results from biosynthetic and combined models are overlaying.

**Table S4** Chlorophyll fluorescence measurements for Spruce 1 and Spruce 2 during the Temperature Cycle. Each value is the average of three measurements taken from three branches on the same tree.

| Date       | Light Intensity<br>$\mu\text{mol m}^{-2} \text{s}^{-1}$ | Temperature<br>$^{\circ}\text{C}$ | Spruce 1 | Spruce 2 |
|------------|---------------------------------------------------------|-----------------------------------|----------|----------|
| 16/11/2021 | 0                                                       | 12                                | 0.815    | 0.810    |
| 16/11/2021 | 44                                                      | 18                                | 0.762    | 0.773    |
| 19/11/2021 | 0                                                       | 12                                | 0.821    | 0.831    |
| 19/11/2021 | 44                                                      | 18                                | 0.820    | 0.785    |
| 22/11/2021 | 0                                                       | 12                                | 0.815    | 0.760    |
| 22/11/2021 | 44                                                      | 18                                | 0.785    | 0.805    |

The  $F_v/F_m$  values obtained for Spruce 1 and Spruce 2 during the *Temperature Cycle* are listed in Table S2.5. The values in the dark were centred around 0.8 and were similar to those observed during the *Daily Cycle*. One branch on Spruce 2 had lower measurements, and may indicate that Spruce 2 was stressed.

**Table S5** Chlorophyll fluorescence measurements for Spruce 1 and Spruce 2 during the *Light Cycle*. Each value is the average of three measurements taken from three branches on the same tree.

| Date       | Light Intensity<br>$\mu\text{mol m}^{-2} \text{s}^{-1}$ | Temperature<br>$^{\circ}\text{C}$ | Spruce 1 | Spruce 2 |
|------------|---------------------------------------------------------|-----------------------------------|----------|----------|
| 28/11/2022 | 0                                                       | 18                                | 0.804    | 0.828    |
| 28/11/2022 | 164                                                     | 18                                | 0.653    | 0.742    |
| 30/11/2021 | 0                                                       | 18                                | 0.694    | 0.768    |
| 30/11/2021 | 164                                                     | 18                                | 0.718    | 0.751    |
| 02/12/2021 | 0                                                       | 18                                | 0.726    | 0.769    |
| 02/12/2021 | 164                                                     | 18                                | 0.750    | 0.724    |

The  $F_v/F_m$  values recorded during the *Light Cycle* for Spruce 1 and Spruce 2 were slightly lower than those measured during the other cycles. This indicates that although Spruce 2 was stressed, it was not suffering any additional stress during the *Light Cycle*.

**Table S6** Contribution of  $\text{CO}_2$  uptake, respiration and BVOC emissions to the carbon balance for Sitka spruce.

| Carbon balance  | Carbon flux<br>$\text{mg C day}^{-1} \text{g}^{-1}$ | Respiration<br>% | BVOC emission<br>% |
|-----------------|-----------------------------------------------------|------------------|--------------------|
| Absolute uptake | - 4.07                                              | 6.8              | 0.2                |
| Respiration     | 0.28                                                | -                | -                  |
| BVOC emission   | 0.01                                                | -                | -                  |
| Net uptake      | - 3.78                                              | 7.4              | 0.2                |

**Table S7:** Table of calculated annual emission fluxes for piperitone, isoprene and monoterpenes from Sitka spruce in Ireland.

| BVOC       | Annual emission flux     |                                       |                                      |
|------------|--------------------------|---------------------------------------|--------------------------------------|
|            | tonne year <sup>-1</sup> | $\text{g C ha}^{-1} \text{year}^{-1}$ | $\text{g C m}^{-2} \text{year}^{-1}$ |
| isoprene   | 13,000                   | 34,000                                | 3.3                                  |
| piperitone | 8,200                    | 19,000                                | 1.9                                  |

|              |        |        |     |
|--------------|--------|--------|-----|
| monoterpenes | 1,600  | 4,200  | 0.4 |
| total        | 22,800 | 57,200 | 5.6 |

### Standardisation

**Table S8** BVOC emission fluxes from Spruce 1 standardised to  $1000 \mu\text{mol m}^{-2} \text{s}^{-1}$  and  $30^\circ\text{C}$  in  $\mu\text{g h}^{-1}\text{g}^{-1}$ . BVOC emissions ordered in order of decreasing standardised emission flux.

| Formula                                  | BVOC                  | Standardisation Method | Standardised Emission Flux<br>$\mu\text{g h}^{-1} \text{s}^{-1}$ |
|------------------------------------------|-----------------------|------------------------|------------------------------------------------------------------|
| $\text{C}_{10}\text{H}_{16}\text{O}$     | Piperitone            | Combined               | 17.290                                                           |
| $\text{C}_5\text{H}_8$                   | Isoprene              | Biosynthesis           | 6.306                                                            |
| $\text{C}_{10}\text{H}_{16}$             | Monoterpene           | Combined               | 0.925                                                            |
| $\text{C}_{10}\text{H}_{14}\text{O}$     |                       | Combined               | 0.859                                                            |
| $\text{C}_5\text{H}_8\text{O}_2$         |                       | Biosynthesis           | 0.467                                                            |
| $\text{C}_{10}\text{H}_{16}\text{O}_2$   |                       | Combined               | 0.455                                                            |
| $\text{C}_9\text{H}_8\text{O}$           | (E)-Cinnamaldehyde    | Biosynthesis           | 0.334                                                            |
| $\text{C}_{13}\text{H}_{30}\text{O}_5$   |                       | Combined               | 0.276                                                            |
| $\text{C}_{12}\text{H}_{20}\text{O}$     |                       | Biosynthesis           | 0.271                                                            |
| $\text{C}_{10}\text{H}_{16}\text{O}$     | Camphor               | Combined               | 0.199                                                            |
| $\text{C}_5\text{H}_{10}\text{O}_6$      |                       | Biosynthesis           | 0.196                                                            |
| $\text{C}_{20}\text{H}_{24}$             |                       | Combined               | 0.177                                                            |
| $\text{C}_{10}\text{H}_{14}\text{O}_2$   |                       | Combined               | 0.166                                                            |
| $\text{C}_{10}\text{H}_{10}$             |                       | Biosynthesis           | 0.155                                                            |
| $\text{C}_{10}\text{H}_{20}\text{O}_2$   | Isopentyl isovalerate | Biosynthesis           | 0.148                                                            |
| $\text{C}_8\text{H}_{12}$                |                       | Combined               | 0.147                                                            |
| $\text{C}_{14}\text{H}_{16}\text{O}$     |                       | Combined               | 0.138                                                            |
| $\text{C}_7\text{H}_{12}\text{N}_2$      |                       | Biosynthesis           | 0.127                                                            |
| $\text{C}_3\text{H}_8\text{N}_2\text{O}$ |                       | Biosynthesis           | 0.082                                                            |
| $\text{C}_6\text{H}_{14}\text{O}_3$      |                       | Combined               | 0.082                                                            |
| $\text{C}_{12}\text{H}_{16}$             |                       | Biosynthesis           | 0.081                                                            |
| $\text{C}_{11}\text{H}_{14}\text{O}$     |                       | Combined               | 0.077                                                            |
| $\text{C}_{20}\text{H}_{24}\text{O}_2$   |                       | Combined               | 0.074                                                            |
| $\text{C}_7\text{H}_4\text{O}_4$         |                       | Combined               | 0.067                                                            |
| $\text{C}_7\text{H}_8\text{O}$           |                       | Combined               | 0.052                                                            |
| $\text{C}_{17}\text{H}_{26}\text{O}$     |                       | Combined               | 0.046                                                            |
| $\text{C}_7\text{H}_8$                   |                       | Combined               | 0.040                                                            |

|                                                |  |              |       |
|------------------------------------------------|--|--------------|-------|
| C <sub>9</sub> H <sub>12</sub>                 |  | Combined     | 0.030 |
| C <sub>13</sub> H <sub>12</sub> O              |  | Biosynthesis | 0.025 |
| C <sub>10</sub> H <sub>18</sub> O <sub>4</sub> |  | Combined     | 0.020 |
| C <sub>10</sub> H <sub>14</sub> O <sub>5</sub> |  | Combined     | 0.016 |
| C <sub>5</sub> H <sub>10</sub> NO <sub>2</sub> |  | Combined     | 0.015 |
| C <sub>18</sub> H <sub>34</sub> O              |  | Combined     | 0.014 |
| C <sub>3</sub> H <sub>9</sub> N                |  | Combined     | 0.012 |

**Table S9** BVOC emission fluxes from Spruce 2 standardised to 1000  $\mu\text{mol m}^{-2} \text{s}^{-1}$  and 30°C in  $\mu\text{g h}^{-1}\text{g}^{-1}$ . BVOC emissions ordered in order of decreasing standardised emission flux.

| Formula                                        | BVOC                          | Standardisation Method | Standardised Emission Flux<br>$\mu\text{g h}^{-1} \text{s}^{-1}$ |
|------------------------------------------------|-------------------------------|------------------------|------------------------------------------------------------------|
| C <sub>10</sub> H <sub>16</sub>                | Monoterpene                   | Combined               | 1.226                                                            |
| C <sub>10</sub> H <sub>16</sub> O              | Piperitone                    | Combined               | 1.029                                                            |
| C <sub>6</sub> H <sub>8</sub> O                |                               | Pooled                 | 0.192                                                            |
| C <sub>20</sub> H <sub>24</sub>                |                               | Pooled                 | 0.134                                                            |
| C <sub>9</sub> H <sub>8</sub> O                | ( <i>E</i> )-Cinnamaldehyde   | Combined               | 0.120                                                            |
| C <sub>6</sub> H <sub>10</sub> O               | <i>E</i> -2-Hexenal           | Pooled                 | 0.104                                                            |
| C <sub>15</sub> H <sub>24</sub>                | <i>E</i> - $\beta$ -Farnesene | Combined               | 0.097                                                            |
| C <sub>8</sub> H <sub>12</sub> O               |                               | Combined               | 0.073                                                            |
| C <sub>14</sub> H <sub>16</sub> O              |                               | Combined               | 0.071                                                            |
| C <sub>10</sub> H <sub>14</sub> O <sub>2</sub> |                               | Pooled                 | 0.066                                                            |
| C <sub>10</sub> H <sub>16</sub> O              | Camphor                       | Combined               | 0.061                                                            |
| C <sub>7</sub> H <sub>8</sub> O                |                               | Combined               | 0.056                                                            |
| C <sub>13</sub> H <sub>30</sub> O <sub>5</sub> |                               | Combined               | 0.055                                                            |
| C <sub>8</sub> H <sub>12</sub>                 |                               | Combined               | 0.051                                                            |
| C <sub>9</sub> H <sub>12</sub> O               |                               | Combined               | 0.046                                                            |
| C <sub>9</sub> H <sub>12</sub>                 |                               | Combined               | 0.035                                                            |
| C <sub>8</sub> H <sub>8</sub> O <sub>3</sub>   | Methyl salicylate             | Combined               | 0.033                                                            |
| C <sub>20</sub> H <sub>24</sub> O <sub>2</sub> |                               | Combined               | 0.033                                                            |
| C <sub>7</sub> H <sub>8</sub>                  |                               | Combined               | 0.031                                                            |
| C <sub>10</sub> H <sub>16</sub>                |                               | Pooled                 | 0.029                                                            |
| C <sub>10</sub> H <sub>18</sub> O <sub>4</sub> |                               | Combined               | 0.025                                                            |
| C <sub>6</sub> H <sub>8</sub>                  |                               | Combined               | 0.023                                                            |

|                                                |            |          |       |
|------------------------------------------------|------------|----------|-------|
| C <sub>10</sub> H <sub>18</sub> O              | Eucalyptol | Combined | 0.022 |
| C <sub>17</sub> H <sub>26</sub> O              |            | Combined | 0.018 |
| C <sub>9</sub> H <sub>10</sub> O <sub>2</sub>  |            | Combined | 0.018 |
| C <sub>12</sub> H <sub>16</sub> O              |            | Combined | 0.012 |
| C <sub>7</sub> H <sub>10</sub> O               |            | Combined | 0.009 |
| C <sub>10</sub> H <sub>16</sub> O <sub>3</sub> |            | Combined | 0.008 |
| C <sub>8</sub> H <sub>12</sub>                 |            | Combined | 0.007 |
| C <sub>6</sub> H <sub>8</sub> O                |            | Combined | 0.007 |
| C <sub>10</sub> H <sub>14</sub> O <sub>2</sub> |            | Pooled   | 0.006 |
| C <sub>18</sub> H <sub>34</sub> O              |            | Combined | 0.003 |

### References

- Hayward, S., Tani, A., Owen, S., and Hewitt, C.: Online analysis of volatile organic compound emissions from Sitka spruce (*Picea sitchensis*), *Tree Physiology*, 24, 721-728, 10.1093/treephys/24.7.721, 2004.
- Henriques, F.: Leaf Chlorophyll Fluorescence: Background and Fundamentals for Plant Biologists, *Botanical Review*, 75, 249-270, 10.1007/s12229-009-9035-y, 2009.
- Janson, R., De Serves, C., and Romero, R.: Emission of isoprene and carbonyl compounds from a boreal forest and wetland in Sweden, *Agricultural and Forest Meteorology*, 98-9, 671-681, 10.1016/S0168-1923(99)00134-3, 1999.
- Maxwell, K. and Johnson, G.: Chlorophyll fluorescence - a practical guide, *Journal of Experimental Botany*, 51, 659-668, 10.1093/jexbot/51.345.659, 2000.
- Niinemets, Ü., Kuhn, U., Harley, P. C., Staudt, M., Arneth, A., Cescatti, A., Ciccioli, P., Copolovici, L., Geron, C., Guenther, A., Kesselmeier, J., Lerdau, M. T., Monson, R. K., and Peñuelas, J.: Estimations of isoprenoid emission capacity from enclosure studies: measurements, data processing, quality and standardized measurement protocols, *Biogeosciences*, 8, 2209-2246, 10.5194/bg-8-2209-2011, 2011.
- Ortega, J. and Helmig, D.: Approaches for quantifying reactive and low-volatility biogenic organic compound emissions by vegetation enclosure techniques - Part A, *Chemosphere*, 72, 343-364, 10.1016/j.chemosphere.2007.11.020, 2008.
